# Supplementary material for: A Hard Look at SPAC Projections
Source: Atypon-hosted journal article supplement (doi:10.1287/mnsc.2022.4385), 2022-03-25
Supplement: mnsc.2022.4385.sm1.pdf [file mnsc.2022.4385.sm1.pdf]

## **A Hard Look at SPAC Projections**

### **ONLINE APPENDIX**

## Online Appendix

### Table A – Forecast error scaled by target firm assets

**Panel A: Forecast accuracy by horizon**

|                            | n   | Percentage<br>meets/beats | Error/Assets<br>mean[median] | Forecast error (actual revenue minus forecasted revenue) scaled by Assets |                |                 |               |                           |               |              |        |
|----------------------------|-----|---------------------------|------------------------------|---------------------------------------------------------------------------|----------------|-----------------|---------------|---------------------------|---------------|--------------|--------|
|                            |     |                           |                              | Percentage below forecast                                                 |                |                 |               | Percentage above forecast |               |              |        |
|                            |     |                           |                              | < -20%                                                                    | [-20% to -10%) | [-10% to -2.5%) | [-2.5% to 0%) | [0% to 2.5%)              | [2.5% to 10%) | [10% to 20%) | >= 20% |
| 1-year ahead forecasts     | 102 | 42%                       | -13%[0%]                     | 16%                                                                       | 5%             | 17%             | 20%           | 22%                       | 13%           | 1%           | 6%     |
| 2-year ahead forecasts     | 39  | 21%                       | -22%[-6%]                    | 28%                                                                       | 13%            | 28%             | 10%           | 3%                        | 8%            | 5%           | 5%     |
| 3-year ahead forecasts     | 10  | 10%                       | -88%[-29%]                   | 60%                                                                       | 30%            | 0%              | 0%            | 0%                        | 0%            | 10%          | 0%     |
| 4-year ahead forecasts     | 1   | 0%                        | -175%[-175%]                 | 100%                                                                      | 0%             | 0%              | 0%            | 0%                        | 0%            | 0%           | 0%     |
| All forecasts              | 152 | 35%                       | -23%[-2%]                    | 22%                                                                       | 8%             | 18%             | 17%           | 16%                       | 11%           | 3%           | 5%     |
| Diff = Multi-year – 1-year |     | -24%***                   | -26%***                      |                                                                           |                |                 |               |                           |               |              |        |

**Panel B: Cumulative Forecast accuracy by horizon**

|                            | n   | Percentage<br>meets/beats | Error/Assets<br>mean[median] | Cumulative forecast error (actual revenue minus forecasted revenue) scaled by Assets |                |                 |               |                           |               |              |        |
|----------------------------|-----|---------------------------|------------------------------|--------------------------------------------------------------------------------------|----------------|-----------------|---------------|---------------------------|---------------|--------------|--------|
|                            |     |                           |                              | Percentage below forecast                                                            |                |                 |               | Percentage above forecast |               |              |        |
|                            |     |                           |                              | < -20%                                                                               | [-20% to -10%) | [-10% to -2.5%) | [-2.5% to 0%) | [0% to 2.5%)              | [2.5% to 10%) | [10% to 20%) | >= 20% |
| 1-year ahead forecasts     | 102 | 42%                       | -13%[0%]                     | 16%                                                                                  | 5%             | 17%             | 20%           | 22%                       | 13%           | 1%           | 6%     |
| 2-year ahead forecasts     | 39  | 18%                       | -34%[-8%]                    | 36%                                                                                  | 8%             | 26%             | 12%           | 5%                        | 8%            | 0%           | 5%     |
| 3-year ahead forecasts     | 10  | 10%                       | -124%[-54%]                  | 80%                                                                                  | 10%            | 0%              | 0%            | 0%                        | 0%            | 0%           | 10%    |
| 4-year ahead forecasts     | 1   | 0%                        | -442%[-442%]                 | 100%                                                                                 | 0%             | 0%              | 0%            | 0%                        | 0%            | 0%           | 0%     |
| All forecasts              | 152 | 34%                       | -31%[-2%]                    | 26%                                                                                  | 6%             | 18%             | 16%           | 16%                       | 11%           | 1%           | 6%     |
| Diff = Multi-year – 1-year |     | -26%***                   | -45%***                      |                                                                                      |                |                 |               |                           |               |              |        |

*Notes:* As referenced in footnote 5 of our paper, this table presents our results from Panels A and B of Table 3 when scaling the forecast errors by the target firm's pre-merger assets rather than its projected revenues. \*\*\* denotes two-tailed statistical significance at 1%, \*\* at 5%, and \* at 10%.

## Online Appendix

### Table B – Forecast accuracy by projected revenue growth

**Panel A: Forecast accuracy by projected revenue growth**

|                         | n   | Percentage<br>meets/beats | Forecast Error<br>mean[median] | Forecast error (actual revenue minus forecasted revenue) scaled by forecasted revenue |               |                |              |                           |              |              |        |
|-------------------------|-----|---------------------------|--------------------------------|---------------------------------------------------------------------------------------|---------------|----------------|--------------|---------------------------|--------------|--------------|--------|
|                         |     |                           |                                | Percentage below forecast                                                             |               |                |              | Percentage above forecast |              |              |        |
|                         |     |                           |                                | < -50%                                                                                | [-50 to -25%) | [-25% to -10%) | [-10% to 0%) | [0% to 10%)               | [10% to 25%) | [25% to 50%) | >= 50% |
| Group 1 (lowest)        | 38  | 47%                       | -5%[-1%]                       | 11%                                                                                   | 3%            | 13%            | 26%          | 37%                       | 0%           | 5%           | 5%     |
| Group 2                 | 38  | 34%                       | -8%[-3%]                       | 5%                                                                                    | 11%           | 13%            | 37%          | 24%                       | 5%           | 5%           | 0%     |
| Group 3                 | 38  | 37%                       | -11%[-4%]                      | 11%                                                                                   | 13%           | 13%            | 26%          | 24%                       | 5%           | 5%           | 3%     |
| Group 4 (highest)       | 38  | 18%                       | -34%[-20%]                     | 40%                                                                                   | 5%            | 5%             | 32%          | 15%                       | 0%           | 3%           | 0%     |
| All Forecasts           | 152 | 35%                       | -14%[-4%]                      | 16%                                                                                   | 8%            | 11%            | 30%          | 25%                       | 3%           | 5%           | 2%     |
| Diff: Group 4 – Group 1 |     | -29%***                   | -29%***                        |                                                                                       |               |                |              |                           |              |              |        |

**Panel B: Cumulative Forecast accuracy by projected revenue growth**

|                         | n   | Percentage<br>meets/beats | Forecast Error<br>mean[median] | Cumulative forecast error (actual revenue minus forecasted revenue) scaled by forecasted revenue |               |                |              |                           |              |              |        |
|-------------------------|-----|---------------------------|--------------------------------|--------------------------------------------------------------------------------------------------|---------------|----------------|--------------|---------------------------|--------------|--------------|--------|
|                         |     |                           |                                | Percentage below forecast                                                                        |               |                |              | Percentage above forecast |              |              |        |
|                         |     |                           |                                | < -50%                                                                                           | [-50 to -25%) | [-25% to -10%) | [-10% to 0%) | [0% to 10%)               | [10% to 25%) | [25% to 50%) | >= 50% |
| Group 1 (lowest)        | 38  | 42%                       | -9%[-2%]                       | 11%                                                                                              | 8%            | 13%            | 26%          | 34%                       | 0%           | 5%           | 3%     |
| Group 2                 | 38  | 42%                       | -6%[-1%]                       | 5%                                                                                               | 8%            | 8%             | 37%          | 34%                       | 0%           | 8%           | 0%     |
| Group 3                 | 38  | 32%                       | -15%[-5%]                      | 13%                                                                                              | 18%           | 8%             | 29%          | 24%                       | 3%           | 5%           | 0%     |
| Group 4 (highest)       | 38  | 18%                       | -28%[-9%]                      | 29%                                                                                              | 11%           | 8%             | 34%          | 15%                       | 0%           | 3%           | 0%     |
| All Forecasts           | 152 | 34%                       | -16%[-4%]                      | 15%                                                                                              | 11%           | 9%             | 31%          | 27%                       | 1%           | 5%           | 1%     |
| Diff: Group 4 – Group 1 |     | -24%**                    | -19%**                         |                                                                                                  |               |                |              |                           |              |              |        |

## Online Appendix

### Table C – Robustness to the use of entropy balancing

***Panel A - SPAC and entropy-weighted matched sample comparison***

|            | SPAC |       |       |       | Matched |       |       |       | Comparison of Means |
|------------|------|-------|-------|-------|---------|-------|-------|-------|---------------------|
|            | n    | Mean  | S.D.  | Mdn   | n       | Mean  | S.D.  | Mdn   | Diff=(2)-(6)        |
|            | (1)  | (2)   | (3)   | (4)   | (5)     | (6)   | (7)   | (8)   | (9)                 |
| Assets     | 212  | 771   | 2,320 | 188   | 1,986   | 771   | 2,320 | 188   | 0.00                |
| Revenue    | 212  | 349   | 680   | 101   | 1,986   | 349   | 680   | 101   | 0.00                |
| ROA        | 212  | -0.24 | 0.99  | -0.07 | 1,986   | -0.24 | 0.99  | -0.07 | 0.00                |
| Profit     | 212  | 0.34  | 0.23  | 0.00  | 1,986   | 0.34  | 0.23  | 0.00  | 0.00                |
| Life Cycle | 212  | 2.17  | 1.17  | 2.00  | 1,986   | 2.17  | 1.17  | 2.00  | 0.00                |
| Tech       | 212  | 0.29  | 0.46  | 0.00  | 1,986   | 0.29  | 0.46  | 0.00  | 0.00                |
| Leverage   | 212  | 1.03  | 1.53  | 0.82  | 1,986   | 1.03  | 1.53  | 0.82  | 0.00                |

***Panel B - Revenue growth comparison across the SPAC and entropy-weighted matched sample***

|                  | SPAC Projected Rev Growth |      |      |      | Matched Actual Rev Growth |      |      |      | Comparison of Means |
|------------------|---------------------------|------|------|------|---------------------------|------|------|------|---------------------|
|                  | n                         | Mean | S.D. | Mdn  | n                         | Mean | S.D. | Mdn  | Diff=(2)-(6)        |
|                  | (1)                       | (2)  | (3)  | (4)  | (5)                       | (6)  | (7)  | (8)  | (9)                 |
| All observations | 712                       | 1.16 | 2.51 | 0.48 | 7,711                     | 0.48 | 1.22 | 0.15 | 0.68***             |
| 1-year ahead     | 212                       | 1.23 | 3.21 | 0.24 | 1,986                     | 0.61 | 1.42 | 0.17 | 0.62***             |
| 2-years ahead    | 197                       | 1.13 | 2.79 | 0.36 | 1,766                     | 0.38 | 0.97 | 0.17 | 0.75***             |
| 3-years ahead    | 141                       | 1.14 | 2.12 | 0.52 | 1,545                     | 0.33 | 0.96 | 0.12 | 0.81***             |
| 4-years ahead    | 96                        | 1.17 | 1.65 | 0.74 | 1,312                     | 0.17 | 0.67 | 0.06 | 1.00***             |
| 5-years ahead    | 66                        | 1.16 | 1.21 | 0.82 | 1,102                     | 0.06 | 0.65 | 0.00 | 1.10***             |

*Notes:* As referenced in footnote 8 of our paper, this table presents our Panels A and B results from Table 4 using entropy balancing from the sample of IPO firms to obtain the matched sample rather than using propensity score matching from the universe of US industrial firms. \*\*\* denotes two-tailed statistical significance at 1%, \*\* at 5%, and \* at 10%.

## Online Appendix

**Table D – Robustness to relaxing the survival requirement for matched firms**

|                  | SPAC |      |      |      | Matched |      |      |      | Comparison of Means |
|------------------|------|------|------|------|---------|------|------|------|---------------------|
|                  | n    | Mean | S.D. | Mdn  | n       | Mean | S.D. | Mdn  | Diff=(2)-(6)        |
|                  | (1)  | (2)  | (3)  | (4)  | (5)     | (6)  | (7)  | (8)  | (9)                 |
| All observations | 712  | 1.16 | 2.51 | 0.48 | 544     | 0.32 | 0.91 | 0.14 | 0.84***             |
| 1-year ahead     | 212  | 1.23 | 3.21 | 0.24 | 212     | 0.40 | 1.49 | 0.16 | 0.83***             |
| 2-years ahead    | 197  | 1.13 | 2.79 | 0.36 | 150     | 0.37 | 1.07 | 0.14 | 0.76***             |
| 3-years ahead    | 141  | 1.14 | 2.12 | 0.52 | 91      | 0.24 | 0.54 | 0.14 | 0.90***             |
| 4-years ahead    | 96   | 1.17 | 1.65 | 0.74 | 58      | 0.20 | 0.33 | 0.15 | 0.97***             |
| 5-years ahead    | 66   | 1.16 | 1.21 | 0.82 | 33      | 0.17 | 0.28 | 0.15 | 0.99***             |

*Notes:* As referenced in footnote 9 of our paper, this table presents our Panel B results from Table 4 after relaxing the requirement that SPACs match only with firms that survive at least as many years into the future as the SPAC projects revenues. \*\*\* denotes two-tailed statistical significance at 1%, \*\* at 5%, and \* at 10%.

## Online Appendix

**Table E – Revenue growth comparison, assuming an average 9.4% terminal revenue growth rate**

|                  | SPAC Projected Rev Growth |      |      |      | IPO Actual Rev Growth |      |      |      | Matched Actual Rev Growth |      |      |      | Comparison of Means |               |
|------------------|---------------------------|------|------|------|-----------------------|------|------|------|---------------------------|------|------|------|---------------------|---------------|
|                  | n                         | Mean | S.D. | Mdn  | n                     | Mean | S.D. | Mdn  | n                         | Mean | S.D. | Mdn  | Diff=(2)-(6)        | Diff=(2)-(10) |
|                  | (1)                       | (2)  | (3)  | (4)  | (5)                   | (6)  | (7)  | (8)  | (9)                       | (10) | (11) | (12) | (13)                | (14)          |
| All observations | 1060                      | 0.75 | 1.78 | 0.18 | 7,711                 | 0.41 | 0.65 | 0.24 | 712                       | 0.28 | 1.01 | 0.11 | 0.34***             | 0.47***       |
| 1-year ahead     | 212                       | 1.23 | 3.21 | 0.24 | 1,986                 | 0.60 | 0.88 | 0.33 | 212                       | 0.40 | 1.49 | 0.16 | 0.63***             | 0.83***       |
| 2-years ahead    | 212                       | 0.98 | 2.48 | 0.29 | 1,766                 | 0.48 | 0.72 | 0.28 | 197                       | 0.31 | 0.90 | 0.13 | 0.50***             | 0.67***       |
| 3-years ahead    | 212                       | 0.70 | 1.65 | 0.19 | 1,545                 | 0.38 | 0.59 | 0.24 | 141                       | 0.17 | 0.37 | 0.10 | 0.32**              | 0.53***       |
| 4-years ahead    | 212                       | 0.49 | 1.00 | 0.09 | 1,312                 | 0.32 | 0.49 | 0.21 | 96                        | 0.10 | 0.23 | 0.04 | 0.18**              | 0.39***       |
| 5-years ahead    | 212                       | 0.36 | 0.58 | 0.09 | 1,102                 | 0.28 | 0.39 | 0.20 | 66                        | 0.09 | 0.19 | 0.05 | 0.09**              | 0.27***       |

*Notes:* As referenced in section 3.3 of our paper, this table presents our Panel B results from Table 4, modified to include the assumption that SPACs that do not provide forecasts of at least five years expect annual revenues to grow at the average revenue growth rate for US public firms for the past five years (9.4%) for the missing years. Section 3.3 provides details about our matching process. Variable definitions are in the Appendix. \*\*\* denotes two-tailed statistical significance at 1%, \*\* at 5%, and \* at 10%.

## Online Appendix

**Table F – Comparison of pre-revenue SPACs and pre-revenue IPO firms**

|                  | SPAC - Zero Revenue |       |       |     | IPO - Zero Revenue |      |      |     | Comparison of Means |
|------------------|---------------------|-------|-------|-----|--------------------|------|------|-----|---------------------|
|                  | n                   | Mean  | S.D.  | Mdn | n                  | Mean | S.D. | Mdn | Diff=(2)-(6)        |
|                  | (1)                 | (2)   | (3)   | (4) | (5)                | (6)  | (7)  | (8) | (9)                 |
| All observations | 167                 | 785   | 2,179 | 152 | 1,567              | 26   | 148  | 0   | 759***              |
| 1-year ahead     | 35                  | 96    | 311   | 2   | 429                | 6    | 50   | 0   | 90***               |
| 2-years ahead    | 33                  | 145   | 338   | 24  | 406                | 25   | 191  | 0   | 120***              |
| 3-years ahead    | 33                  | 437   | 798   | 152 | 322                | 37   | 193  | 0   | 400***              |
| 4-years ahead    | 33                  | 988   | 1,881 | 282 | 234                | 41   | 141  | 0   | 947***              |
| 5-years ahead    | 33                  | 2,085 | 4,019 | 931 | 176                | 43   | 133  | 1   | 2,042***            |

*Notes:* As referenced in footnote 13 of our paper, this table presents results from comparing the projected revenue levels for pre-revenue SPACs to the actual future revenue levels of pre-revenue IPO firms. \*\*\* denotes two-tailed statistical significance at 1%, \*\* at 5%, and \* at 10%.
